# Supplementary material for: Upfront allo-HSCT after intensive chemotherapy for untreated aggressive ATL: A single arm, phase 3 trial, JCOG0907
Source: Research Square preprint supplement (doi:10.21203/rs.3.rs-8095067/v1), 2025-12-22
Supplement: Supplementary file 1 [file a532d9ffdbd9e63a456dde7f.docx]

Supplementary data

Figure S1: Kaplan-Meier estimate of overall survival (OS) for the acquisition of protocol donor group (n = 49) vs no acquisition of protocol donor group (n = 61)

Figure S2: Kaplan-Meier estimate of overall survival (OS) for related (n = 23) vs. unrelated (n = 44) vs. cord blood (n = 25) transplantation.


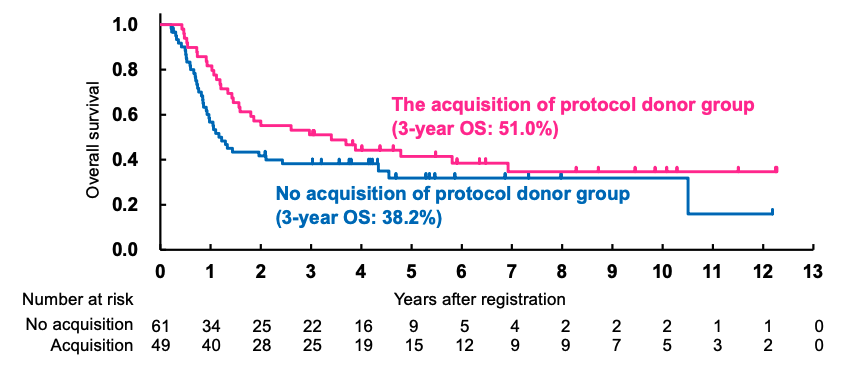


Figure S1


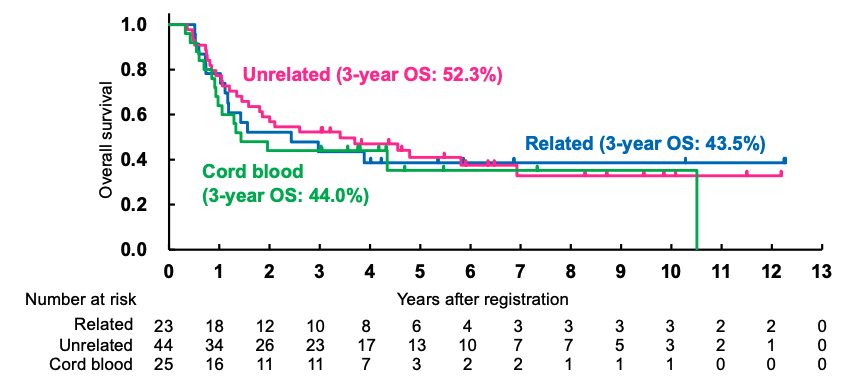


Figure S2
